# Supplementary material for: Noble metal nanomaterial-based aptasensors for microbial toxin detection
Source: PubMed Central journal article supplement — J Food Drug Anal. 2020 Dec 1;28(4):508–20. doi: 10.38212/2224-6614.1155 (PMC9261816; doi:10.38212/2224-6614.1155), 2020-12-01
Supplement: jfda-28-04-508-s001.pdf [file jfda-28-04-508-s001.pdf]

## **Research Highlights**

1. Noble metal nanomaterial-based aptasensors for microbial toxin detection are reviewed.
2. Aptamers have high affinity and specificity to identify target molecules.
3. Noble metal nanomaterials facilitate the detection process.
4. Future potential studies are discussed.
